# Supplementary material
Source: publisher site journal article supplement (https://www.dovepress.com/article/506062)

**Supplementary Figure 1** Standard curves for (A) IL-6 (B) IL-8 (C) CCL2 measurement by ELISAs.


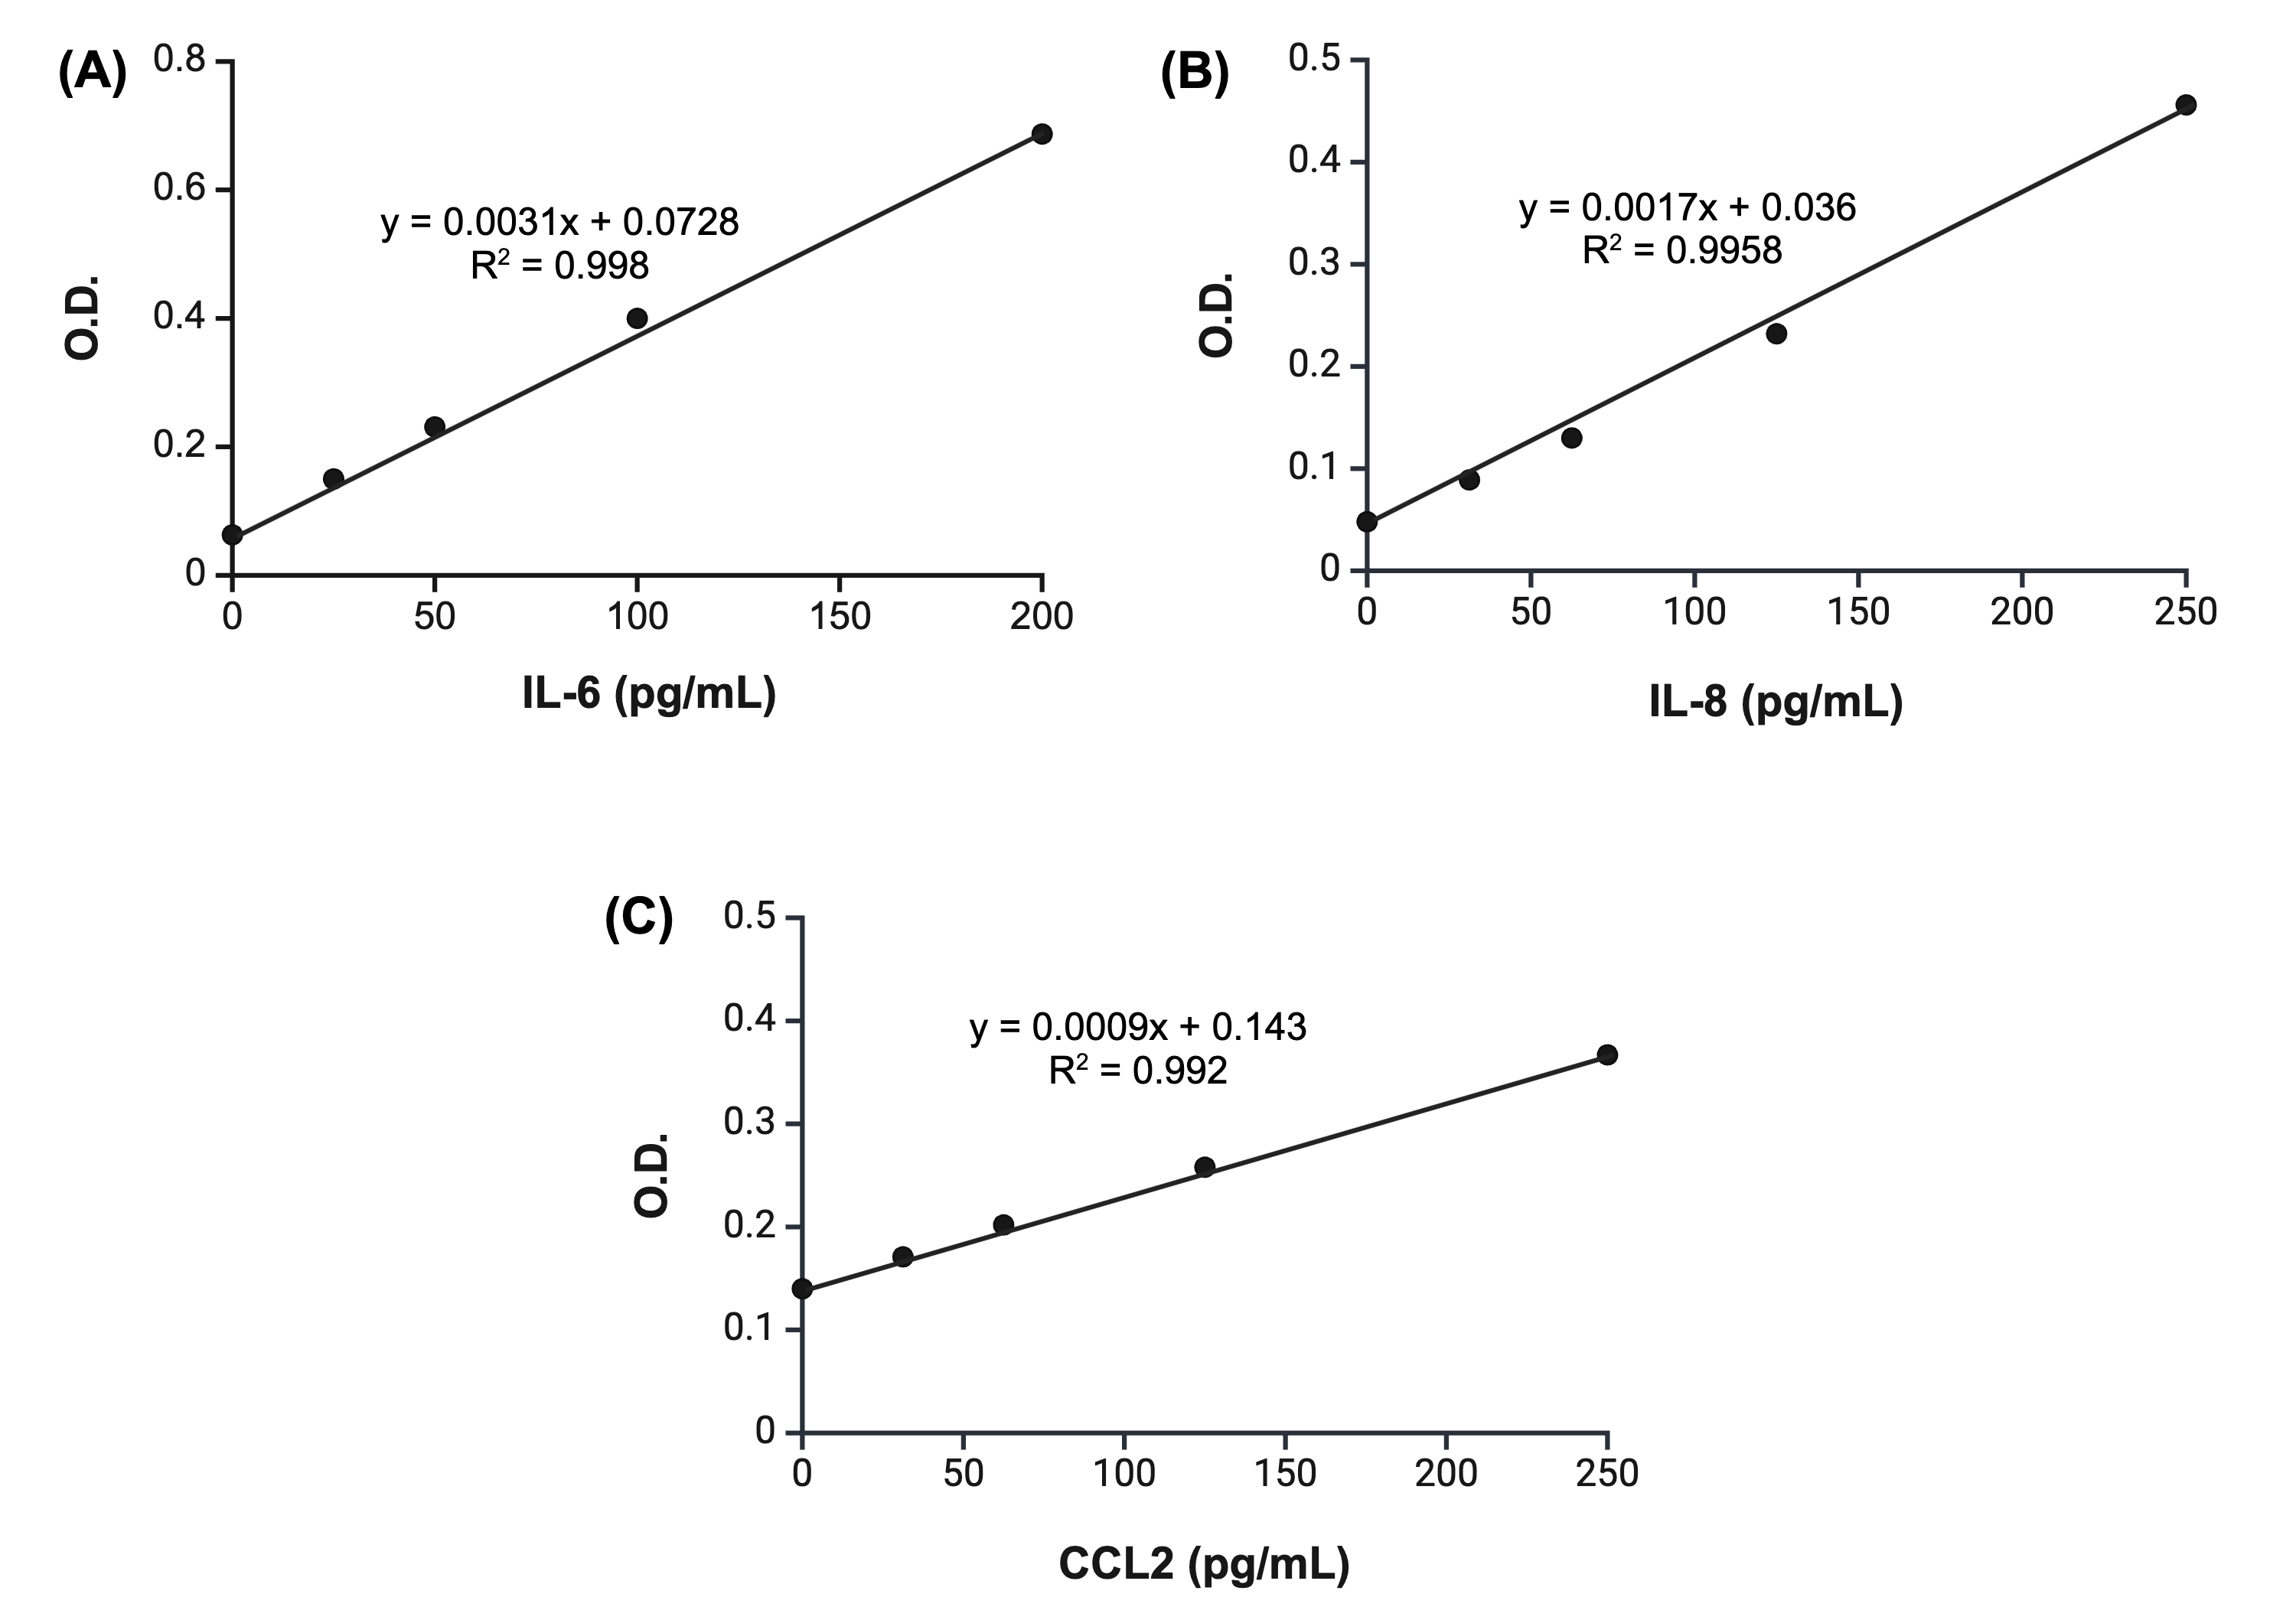

Supplement: Supplementary file 1 [file get_supplementary_file.php]
